# Supplementary material for: Catalytic NO reduction by CO over ceria–cobalt oxide catalysts
Source: Royal Society of Chemistry journal article supplement (doi:10.1039/c9nj04812j), 2019-01-01
Supplement: c9nj04812j1.pdf [file c9nj04812j1.pdf]

Supporting Information

## **Catalytic NO Reduction by CO over Ceria-Cobalt Oxide Catalysts**

**Xiaoran Niu<sup>a</sup>, Zuotao Lei<sup>\*a,b</sup> and Chunhui Yang<sup>\* a,b</sup>**

<sup>[a]</sup> *MIIT Key Laboratory of Critical Materials Technology for New Energy Conversion and Storage, School of Chemistry and Chemical Engineering, Harbin Institute of Technology, Harbin 150001, China.*

<sup>[b]</sup> *Key Laboratory of Micro-systems and Micro-structures Manufacturing of Ministry of Education, Harbin Institute of Technology, Harbin 150001, China. E-mail: [yangchh@hit.edu.cn](mailto:yangchh@hit.edu.cn); [leizuotao@hit.edu.cn](mailto:leizuotao@hit.edu.cn)*

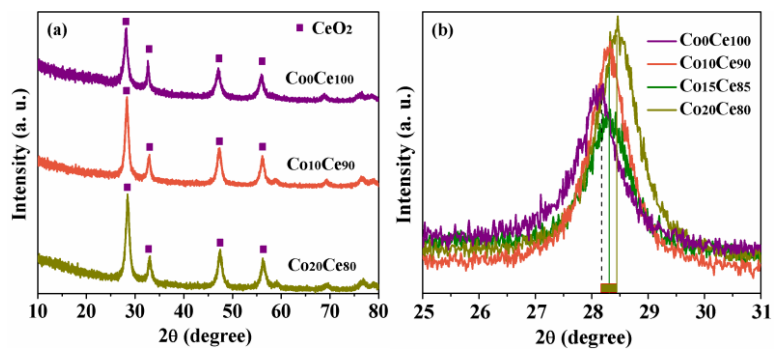

**Fig. S1** XRD patterns of Co<sub>100-x</sub>Ce<sub>x</sub> (x= 80, 90, 100) catalysts (a), the magnified XRD peak from 2θ= 25 to 31° for Co<sub>100-x</sub>Ce<sub>x</sub> (x= 80, 90, 100) catalysts (b).

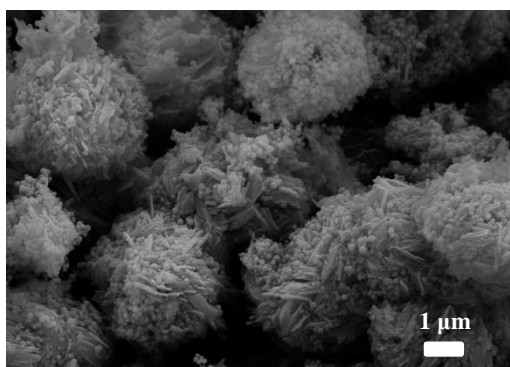

**Fig.S2** SEM images of Co<sub>85</sub>Ce<sub>15</sub> catalyst after calcination.

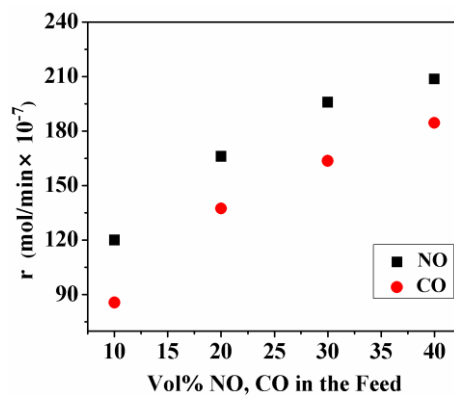

**Fig. S3** Effect of the vol.% of reactant (NO and CO) in the feed on the reaction rate of NO and CO over Co<sub>98</sub>Ce<sub>2</sub> catalyst.

**Table. S1** Surface compositions and relative parameters of Co<sub>100-x</sub>Ce<sub>x</sub> samples

| Catalysts                                 | Textural properties                  |               | Surface atomic ratio               |                                    |
|-------------------------------------------|--------------------------------------|---------------|------------------------------------|------------------------------------|
|                                           | BET surface area (m <sup>2</sup> /g) | Ce/(Ce+Co) /% | Co <sup>2+</sup> /Co <sup>3+</sup> | Ce <sup>3+</sup> /Ce <sup>2+</sup> |
| Co <sub>20</sub> Ce <sub>80</sub>         | 19.5                                 | 85.3          | 0.92                               | 0.40                               |
| Co <sub>10</sub> Ce <sub>90</sub>         | 17.8                                 | 90.0          | 0.93                               | 0.40                               |
| Commercial Co <sub>3</sub> O <sub>4</sub> | 3.4                                  | -             | -                                  | -                                  |

<sup>a</sup> ICP results;

<sup>b</sup> XPS results;

**Table. S2** Ceria content and the catalytic activity data of Co<sub>100-x</sub>Ce<sub>x</sub> samples

| sample                            | Atom content <sup>a</sup> | NO + CO reaction <sup>b</sup>   |        |                                 |        |
|-----------------------------------|---------------------------|---------------------------------|--------|---------------------------------|--------|
|                                   | Ce/(Ce+Co) %              | NO Conv. (C <sub>max</sub> , %) |        | CO Conv. (C <sub>max</sub> , %) |        |
|                                   |                           | <300 °C                         | >580°C | <300 °C                         | >580°C |
| Co <sub>100</sub> Ce <sub>0</sub> | 0                         | 74.9                            | -      | 82.2                            | -      |
| Co <sub>98</sub> Ce <sub>2</sub>  | 1.85                      | 99.7                            | 99.8   | 98.6                            | 99.4   |
| Co <sub>85</sub> Ce <sub>15</sub> | 13.93                     | 85.6                            | -      | 76.7                            | -      |

<sup>a</sup> Determined by the ICP analysis.

<sup>b</sup> the max conversion of reactant (C<sub>max</sub>) measured from the flow reactor of NO+CO reaction.
